# Supplementary material
Source: MDPI journal article supplement (https://www.mdpi.com/1999-4907/14/6/1154)
Supplement: s1 [file s1]

Table S1. Soil properties at the depth of 0-5 cm and herbaceous biomass in interplant (IP) and beneath shrubs (BS) of the study site.

| Site Treatment | SWC (v/v)                   | ST (°C)                     | DOC (g kg <sup>-1</sup> )   | In-N (g kg <sup>-1</sup> ) | pH                          | Herbaceous-biomass (g m <sup>-2</sup> ) |
|----------------|-----------------------------|-----------------------------|-----------------------------|----------------------------|-----------------------------|-----------------------------------------|
| IP N0          | 3.7 (0.3)                   | 34.9 (0.3)                  | 0.34 (0.04)                 | 26.5 (3.67)                | 10.08 (0.32)                | 30.31 (4.14)                            |
| N1             | 3.4 (0.4)                   | 35.0 (0.3)                  | 0.41 (0.04)                 | 43.22 (4.51)               | 9.82 (0.42)                 | 37.44 (4.84)                            |
| N2             | 3.2 (0.4)                   | 35.0 (0.2)                  | 0.45 (0.06)                 | 55.58 (6.18)               | 9.43 (0.43)                 | 43.77 (7.07)                            |
| ANOVA          | F <sub>52,2</sub> = 1.03 ns | F <sub>52,2</sub> = 0.45 ns | F <sub>52,2</sub> = 1.03 ns | F <sub>52,2</sub> = 6.75*  | F <sub>52,2</sub> = 2.77 ns | F <sub>52,2</sub> = 1.5 ns              |
| BS N0          | 4.0 (0.2)                   | 34.7 (0.5)                  | 0.63 (0.07)                 | 31.24 (5.81)               | 10.43 (0.42)                | 22.38 (4.66)                            |
| N1             | 3.3 (0.1)                   | 35.0 (0.4)                  | 0.48 (0.06)                 | 50.13 (9.42)               | 10.21 (0.42)                | 33.19 (8.52)                            |
| N2             | 3.2 (0.2)                   | 34.9 (0.4)                  | 0.45 (0.08)                 | 74.79 (13.07)              | 10.03 (0.36)                | 36.55 (7.26)                            |
| ANOVA          | F <sub>52,2</sub> =3.54*    | F <sub>52,2</sub> =0.41 ns  | F <sub>52,2</sub> =1.54 ns  | F <sub>52,2</sub> =5.10*   | F <sub>52,2</sub> =2.43 ns  | F <sub>52,2</sub> =1.12 ns              |

*SWC* soil water content, *ST* soil temperature in 0-5 cm, *DOC* dissolved organic carbon, *DN* dissolved nitrogen, *In-N* inorganic nitrogen, *B-biomass* belowground biomass. *N0* no nitrogen addition, *N1* 2.5 gN m<sup>-2</sup> yr<sup>-1</sup> addition, *N2* 5 gN m<sup>-2</sup> yr<sup>-1</sup> addition.

Values are means (with 1S.E. in parentheses). Statistical significance was determined at  $P < 0.05$ , with ns indicating no significant difference and \* indicating difference at  $P < 0.05$  between treatments using ANOVA.

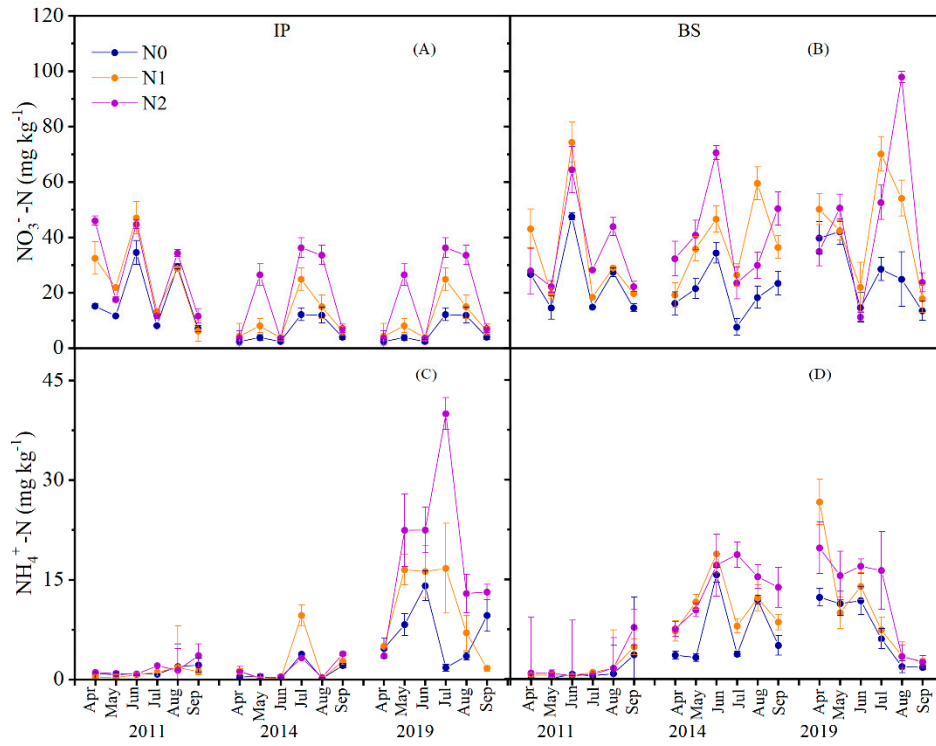

Figure S1. Soil nitrate ( $\text{NO}_3^- \text{-N}$ ) and ammoniacal ( $\text{NH}_4^+ \text{-N}$ ) content in two microsites of interplant space and beneath shrub under three levels of N treatments (N0, N1 and N2). Different small letters indicate significant differences among N treatments at  $p = 0.05$  level. N0: control; N1: 2.5  $\text{gN m}^{-2}\text{yr}^{-1}$  addition; N2: 5  $\text{gN m}^{-2}\text{yr}^{-1}$  addition.

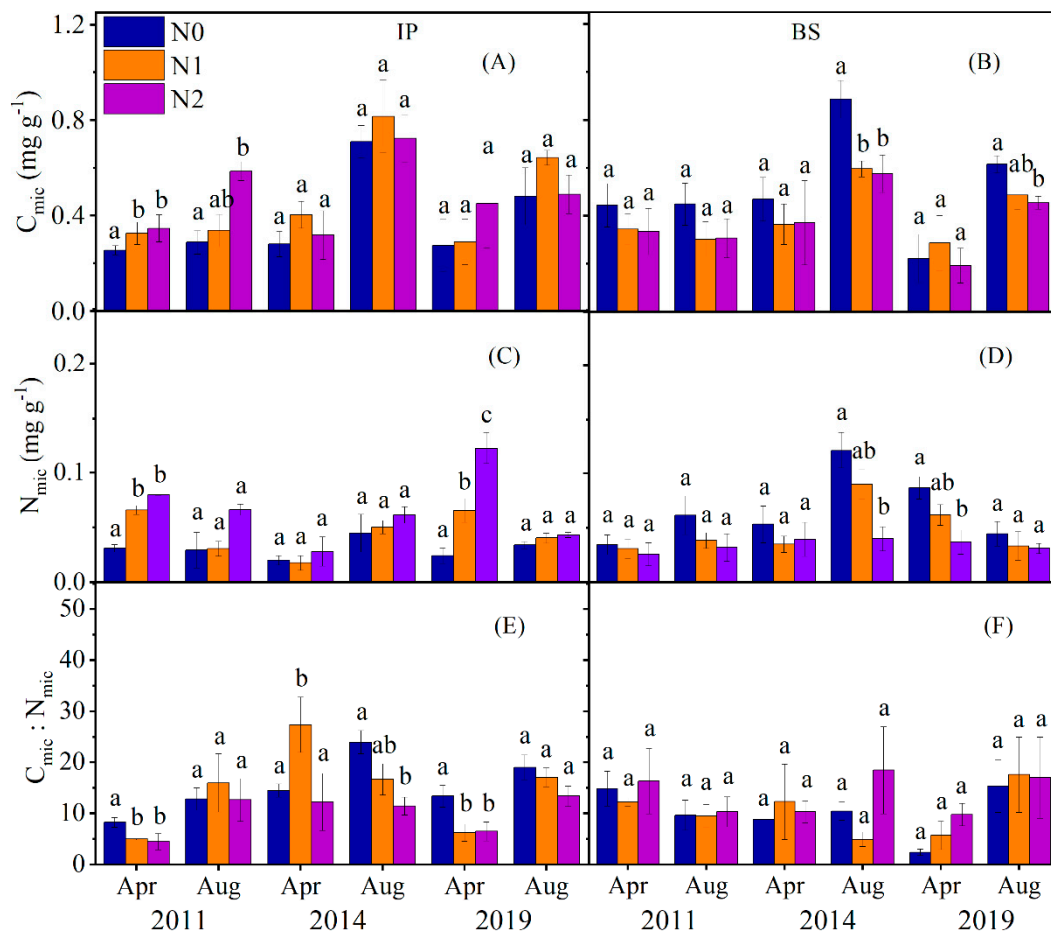

Figure S2. Soil microbial biomass carbon ( $C_{mic}$ ), nitrogen ( $N_{mic}$ ), the ratio of soil microbial biomass carbon to nitrogen ( $C_{mic} : N_{mic}$ ) in two microsites of interplant space and beneath shrub under three levels of N treatments (N0, N1 and N2). Different small letters indicate significant differences among N treatments at  $P = 0.05$  level. N0: control; N1: 2.5 gN m<sup>-2</sup>yr<sup>-1</sup> addition; N2: 5 gN m<sup>-2</sup>yr<sup>-1</sup> addition.

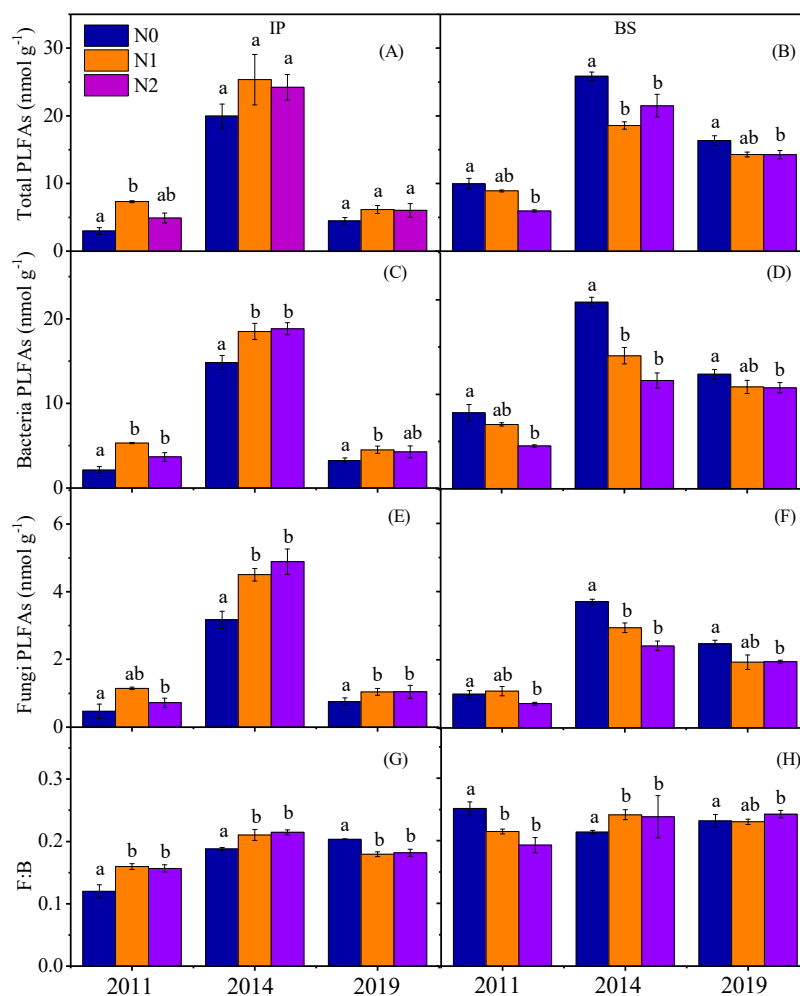

Figure S3. Soil microbial phospholipid fatty acids (PLFAs), bacterial PLFAs, fungal PLFAs and soil fungal to bacterial PLFAs (F:B) in two microsites of interplant space and beneath shrub under three levels of N treatments (N0, N1 and N2). Different small letters indicate significant differences among N treatments at p = 0.05 level. N0: control; N1: 2.5 gN m<sup>-2</sup>yr<sup>-1</sup> addition; N2: 5 gN m<sup>-2</sup>yr<sup>-1</sup> addition.

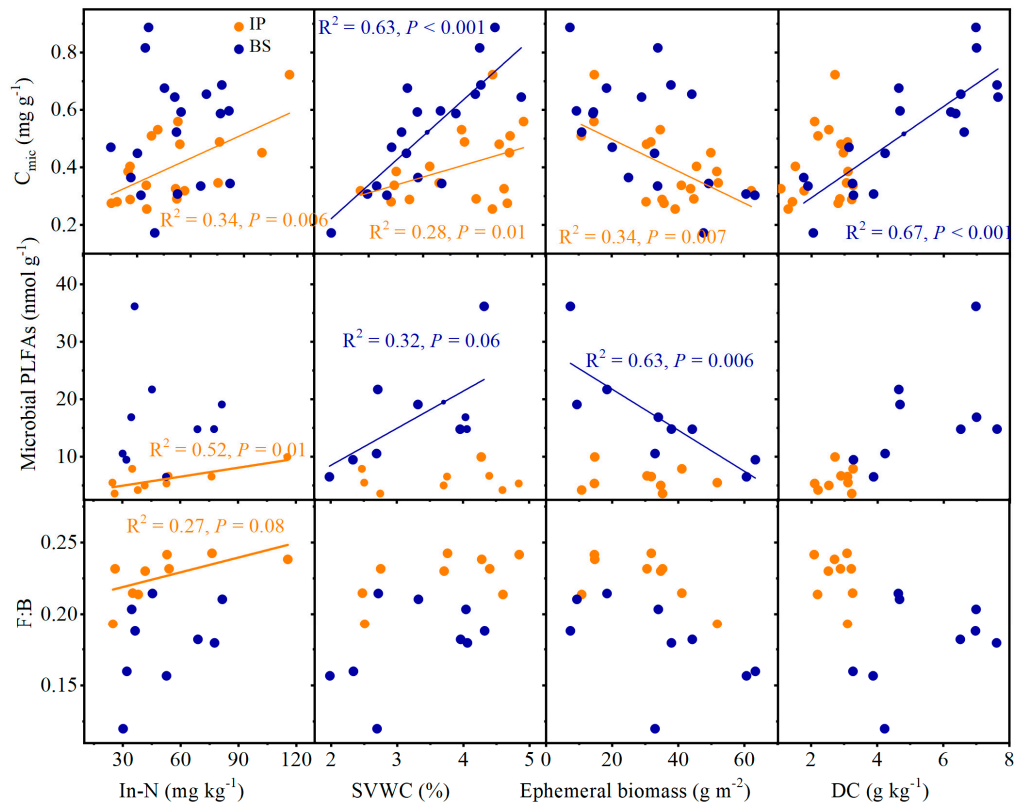

Figure S4. Correlations of soil inorganic nitrogen (In-N), soil volumetric water content (SVWC), ephemeral biomass and soil dissolved carbon (DC) with microbial biomass C ( $C_{mic}$ ), microbial PLFAs and the ratio of fungal to bacterial PLFAs (F:B). Correlation coefficients and associated  $P$  values were based on Pearson correlation tests.
